# Supplementary material for: Light-Responsive Hexagonal Assemblies of Triangular Azo Dyes
Source: MDPI journal article supplement (doi:10.3390/molecules27144380), 2022-07-08
Supplement: s1 [file s1]

## Light-Responsive Hexagonal Assemblies of Triangular Azo Dyes

*Mina Han and Khin Moe*

### Contents

**Figure S1.** Molecular switching of compound **1** between  $C_3$ -symmetric and asymmetric structures based on [A]  $^1\text{H}$  NMR and [B] absorption spectral changes.

**Figure S2.** SEM image of **3** fibrous structures obtained from 40  $\mu\text{M}$  toluene-MeOH (1:3, v/v) mixture.

**Figure S3.** (a) SEM and (b) FOM images of hexagonal rods obtained from 30  $\mu\text{M}$  THF- $\text{H}_2\text{O}$  (1/4, v/v) mixture.

**Figure S4.** SEM images of self-assembled structures of **1** formed in various mixed solutions.

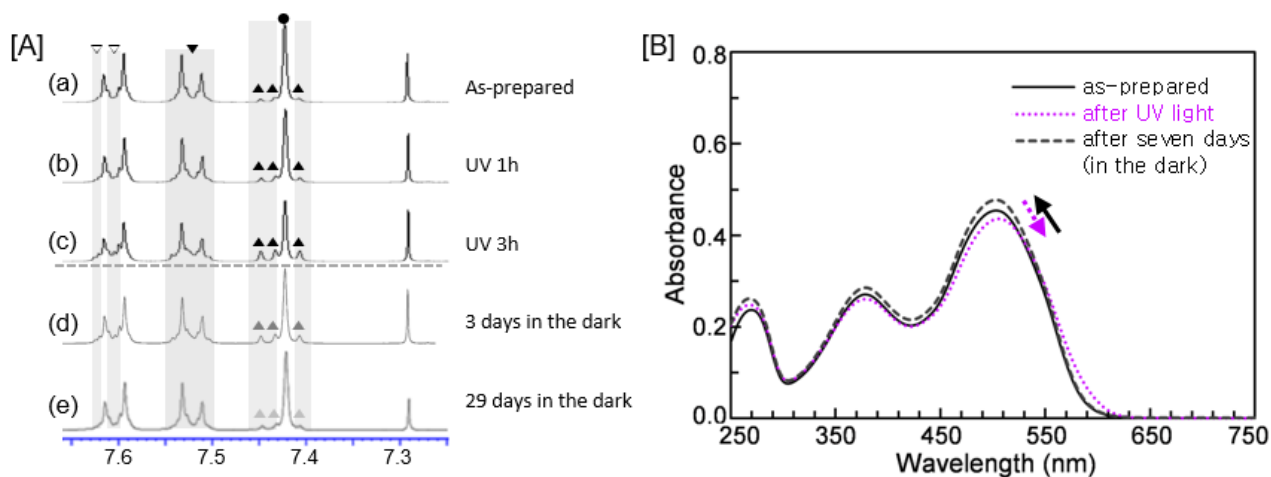

**Figure S1.** Molecular switching of compound **1** between  $C_3$ -symmetric and asymmetric structures based on (A)  $^1\text{H}$  NMR and (B) absorption (in THF) spectral changes by UV light and heat (in the dark). (A-a) As-prepared, after exposure to UV light for (A-b) 1 and (A-c) 3 hours ( $C_3$ -symmetric/asymmetric = 65/35) and after dark incubation for (A-e) 29 days ( $C_3$ -symmetric/asymmetric = 95/5). UV light intensity: 1.5-2.0 mW/cm<sup>2</sup>.

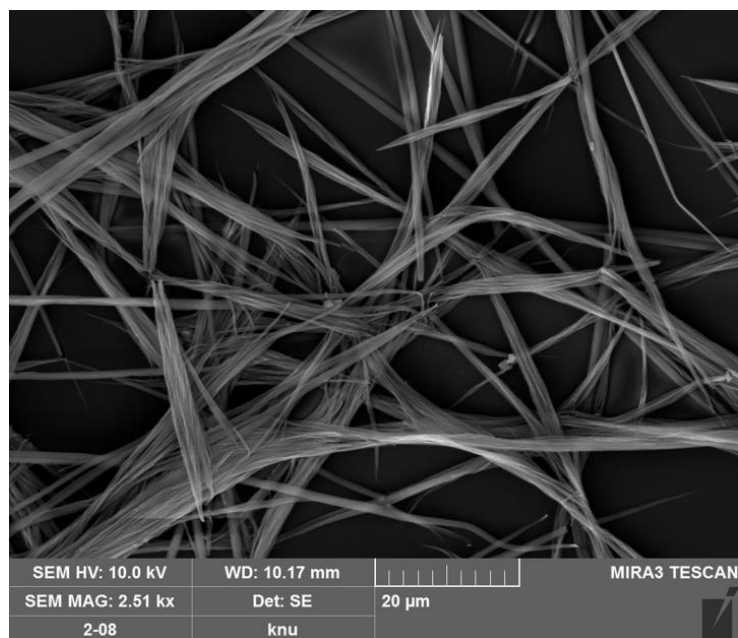

**Figure S2.** SEM image of **3** fibrous structures obtained from a 40 μM toluene-MeOH (1:3, v/v) mixture.

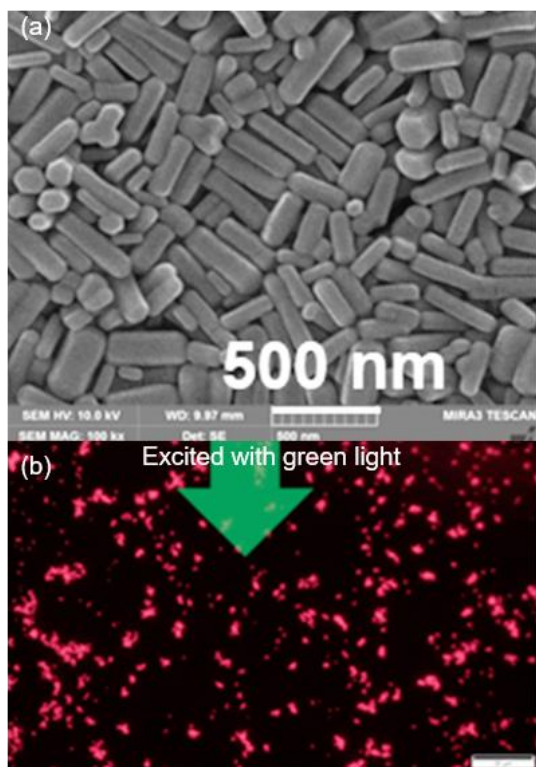

**Figure S3.** (a) SEM and (b) FOM images of hexagonal rods obtained from 30  $\mu\text{M}$  THF- $\text{H}_2\text{O}$  (1/4, v/v) mixture.

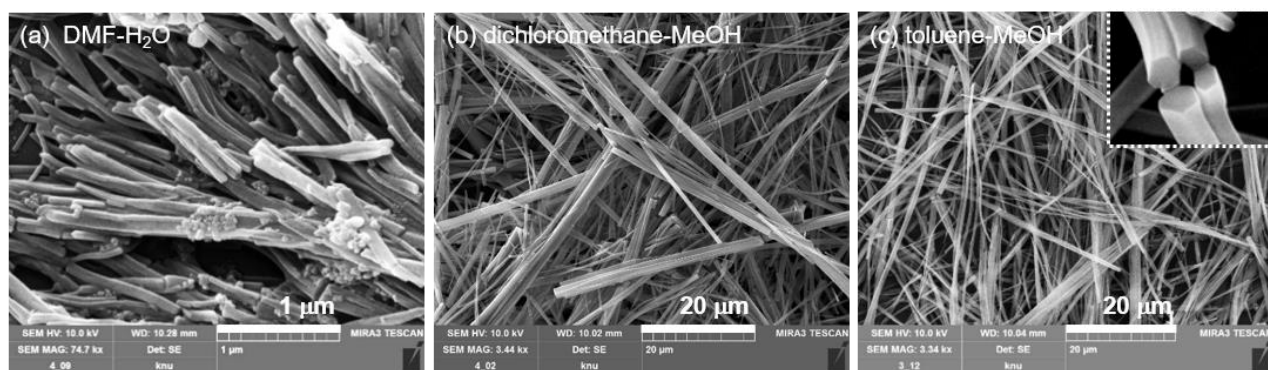

**Figure S4.** SEM images of self-assembled structures of **1** formed in various mixed solutions.
